# Supplementary material
Source: PubMed Central journal article supplement (PMC4939897)
Supplement: NIHMS778369-supplement-1.pdf [file NIHMS778369-supplement-1.pdf]

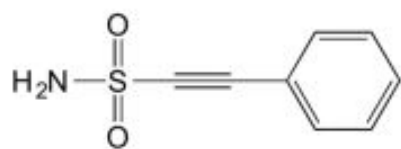

**PES**

(2-Phenylethynesulfonamide)

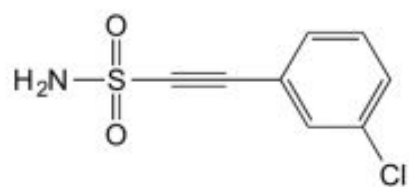

**PES-Cl**

(2-(3-chlorophenyl) ethynesulfonamide)

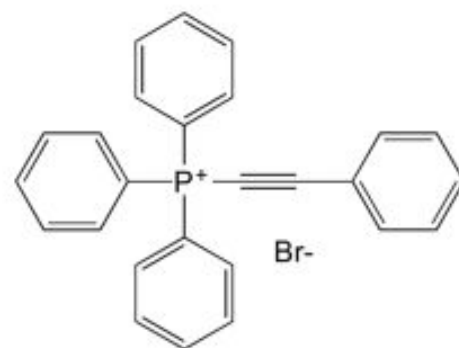

**PET-16**

(Phenylethyltrimethyl phosphonium)
