# Supplementary material
Source: PubMed Central journal article supplement (PMC4939897)
Supplement: NIHMS778369-supplement-9.pdf [file NIHMS778369-supplement-9.pdf]

Table 1.

| Cell line | Molar ratio    | Coefficient of interaction, CI* (+/- S.D.) |               |               |                |                |
|-----------|----------------|--------------------------------------------|---------------|---------------|----------------|----------------|
|           |                | ED50                                       | ED75          | ED90          | ED95           |                |
| 1205Lu    | PET-16:PLX4032 | 1:1                                        | 1.24 +/-0.52  | 0.97 +/-0.03  | 0.84 +/-0.04   | 0.8 +/-0.05    |
|           |                | 1:5                                        | 0.91 +/-0.03  | 0.84 +/-0.02  | 0.8 +/-0.01    | 0.81 +/-0.01   |
|           |                | 1:10                                       | 0.96 +/-0.003 | 1.03 +/-0.01  | 1.14 +/-0.02   | 1.24 +/-0.03   |
|           |                | 5:1                                        | 0.35 +/-0.32  | 0.26 +/-0.31  | 0.21 +/-0.3    | 0.19 +/-0.29   |
|           |                | 10:1                                       | 0.57 +/-0.02  | 0.47 +/- 0.01 | 0.4 +/-0.003   | 0.36 +/-0.0003 |
|           |                | 451Lu                                      | 1:1           | 1.79 +/- 0.07 | 0.8 3 +/-0.04  | 0.61 +/-0.03   |
|           | 1:5            | 0.34 +/- 0.08                              | 0.8 +/-0.02   | 2.07 +/-0.6   | 4.61 +/-2.27   |                |
|           | 1:10           | 0.74 +/- 0.04                              | 1.16 +/-0.01  | 1.91 +/-0.18  | 2.94 +/-0.46   |                |
|           | 5:1            | 1.62 +/-0.03                               | 0.67 +/-0.001 | 0.45 +/-0.01  | 0.41 +/-0.01   |                |
|           | 10:1           | 0.48 +/-0.02                               | 0.3 +/-0.01   | 0.45 +/-0.01  | 0.57 +/-0.01   |                |
| WM989     | 1:1            | 2.32 +/-0.07                               | 0.91 +/-0.11  | 0.46 +/-0.1   | 0.38 +/-0.1    |                |
|           | 1:5            | 0.98 +/-0.1                                | 0.98 +/-0.04  | 1.06 +/-0.01  | 1.28 +/-0.05   |                |
|           | 1:10           | 1.59 +/-0.2                                | 1.27 +/-0.06  | 1.06 +/-0.03  | 1.01 +/-0.08   |                |
|           | 5:1            | 1.48 +/-0.01                               | 0.7 +/-0.01   | 0.5 +/-0.01   | 0.46 +/-0.02   |                |
|           | 10:1           | 0.53 +/-0.05                               | 0.39 +/-0.03  | 0.42 +/-0.09  | 0.48 +/-0.15   |                |
| WM35      | 1:1            | 0.8 9 +/-0.02                              | 0.46 +/-0.004 | 0.32 +/-0.001 | 0.29 +/-0.0006 |                |
|           | 1:5            | 1.09 +/-0.003                              | 0.51 +/-0.02  | 0.27 +/-0.02  | 0.2 +/-0.02    |                |
|           | 1:10           | 1.27 +/-0.04                               | 0.66 +/-0.02  | 0.37 +/-0.03  | 0.27 +/-0.03   |                |
|           | 5:1            | 0.41 +/-0.01                               | 0.36 +/-0.008 | 0.42 +/-0.003 | 0.49 +/-0.0004 |                |
|           | 10:1           | 0.19 +/-0.01                               | 0.25 +/-0.05  | 0.39 +/-0.19  | 0.57 +/-0.39   |                |
| WM164     | 1:1            | 1.06 +/-0.02                               | 0.58 +/-0.007 | 0.47 +/-0.02  | 0.51 +/-0.03   |                |
|           | 1:5            | 0.91 +/-0.04                               | 0.65 +/-0.01  | 0.54 +/-0.001 | 0.58 +/-0.009  |                |
|           | 1:10           | 1.51 +/-0.1                                | 1.01 +/-0.04  | 0.74 +/-0.02  | 0.68 +/-0.01   |                |
|           | 5:1            | 0.69 +/-0.04                               | 0.51 +/-0.01  | 0.52 +/-0.01  | 0.59 +/-0.03   |                |
|           | 10:1           | 0.13 +/-0.01                               | 0.23 +/-0.01  | 0.53 +/-0.001 | 0.99 +/-0.03   |                |
