# Supplementary material
Source: PubMed Central journal article supplement (PMC4939897)

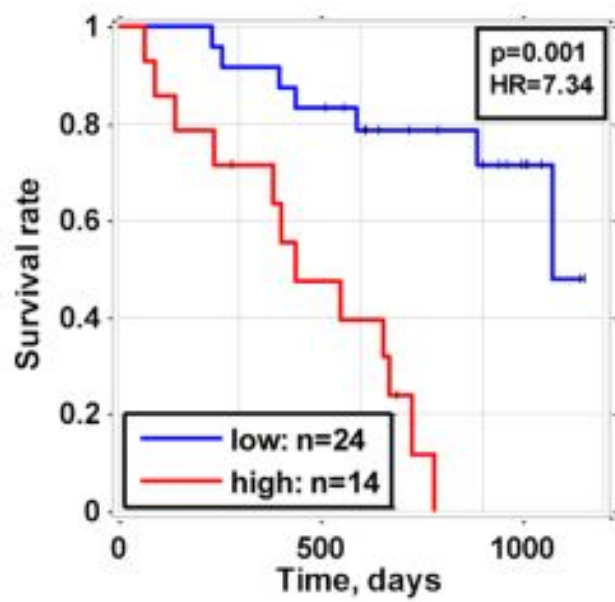

Supplement: NIHMS778369-supplement-3.pdf [file NIHMS778369-supplement-3.pdf]

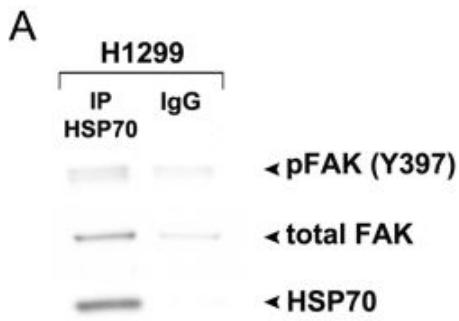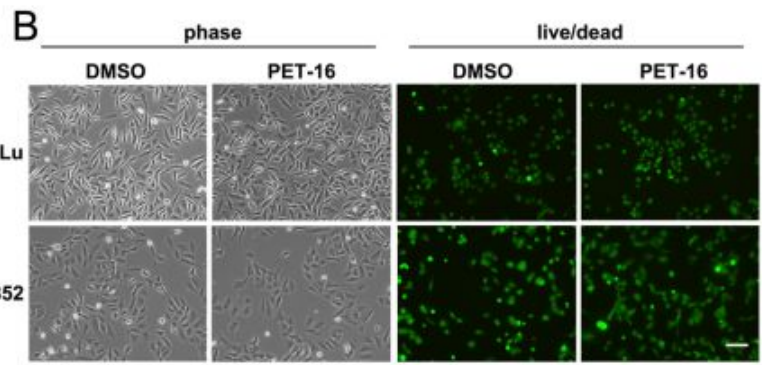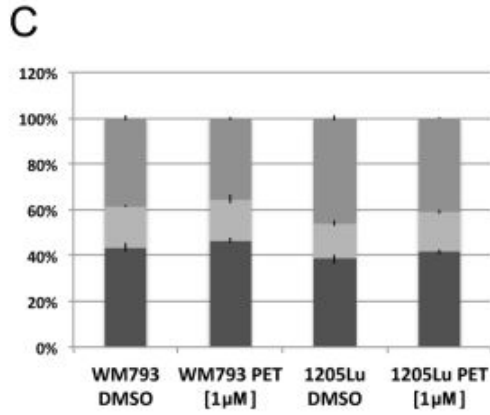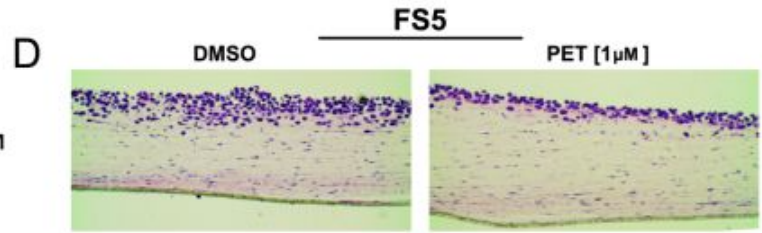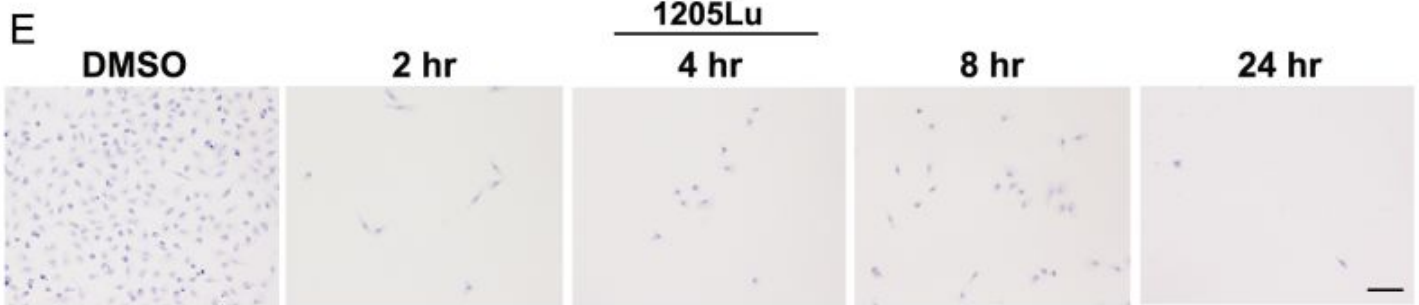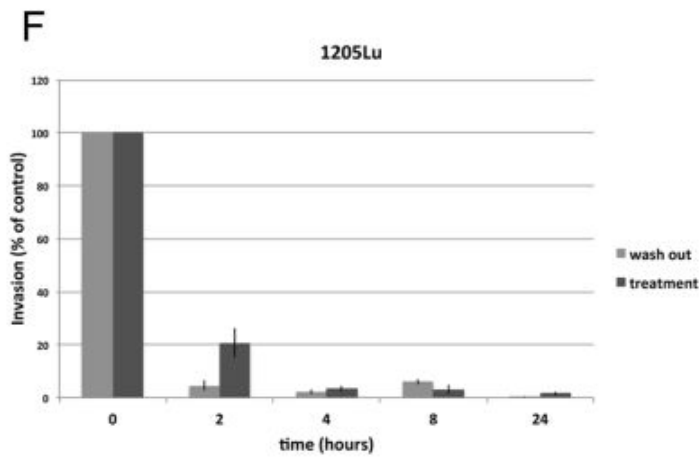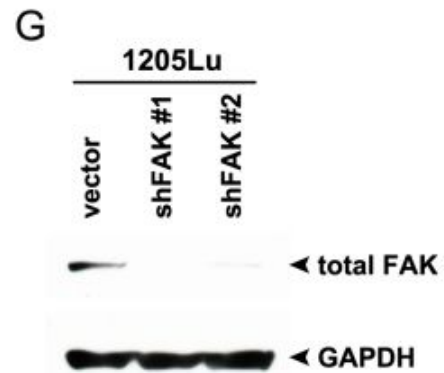

Supplement: NIHMS778369-supplement-4.pdf [file NIHMS778369-supplement-4.pdf]

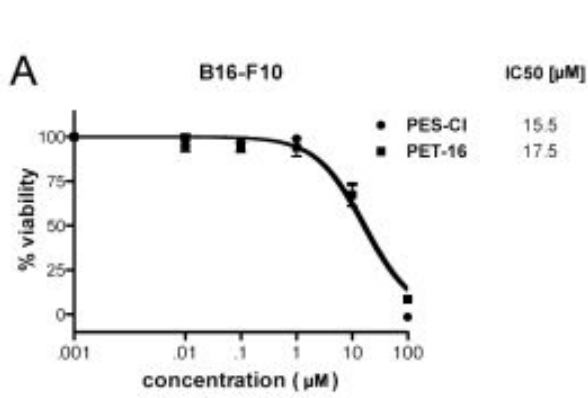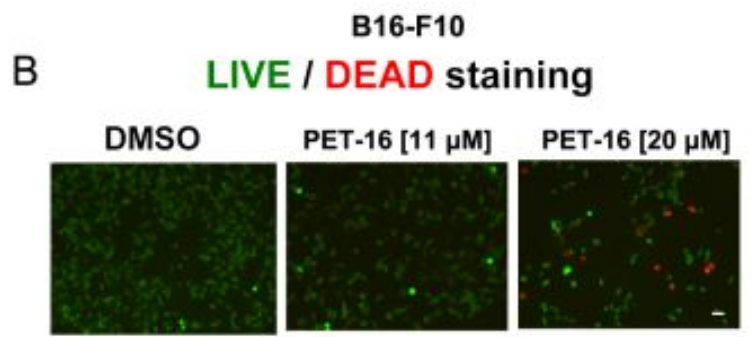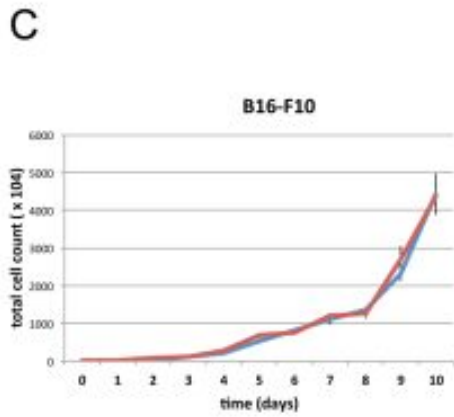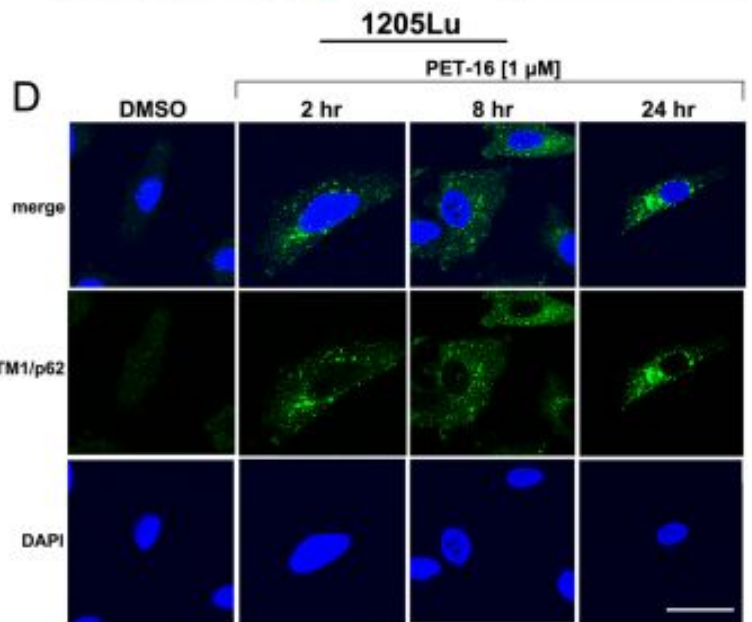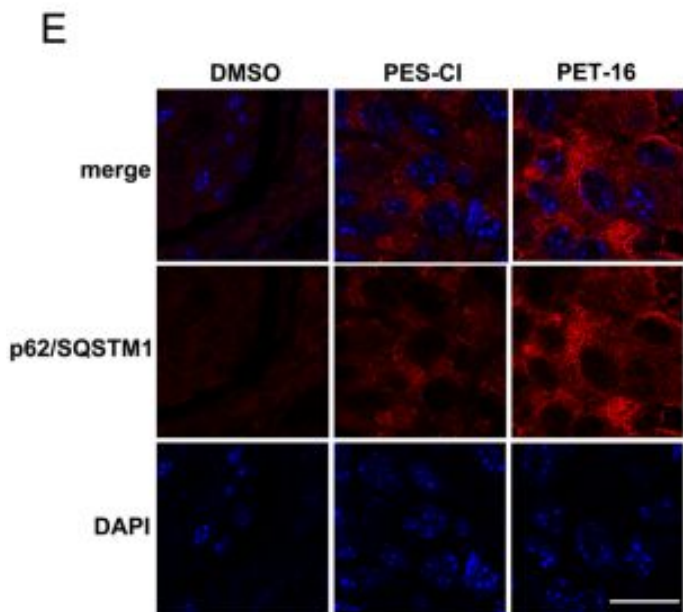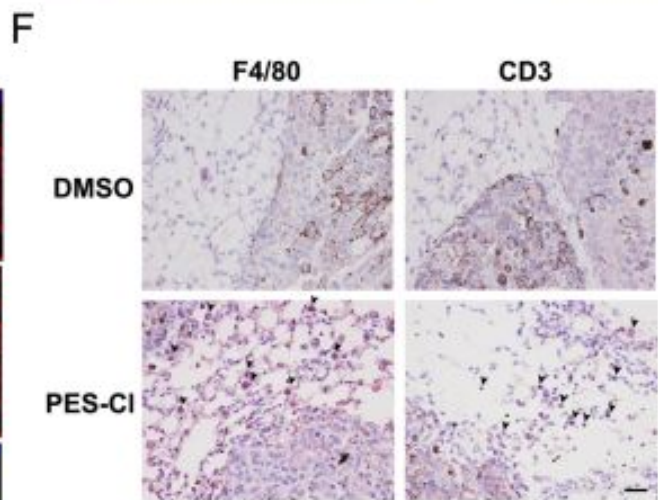

Supplement: NIHMS778369-supplement-5.pdf [file NIHMS778369-supplement-5.pdf]

Suppl. figure 6

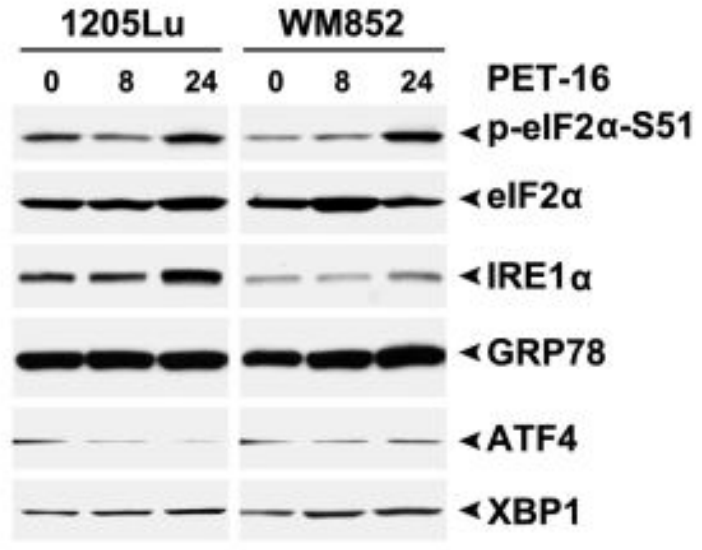

Supplement: NIHMS778369-supplement-6.pdf [file NIHMS778369-supplement-6.pdf]

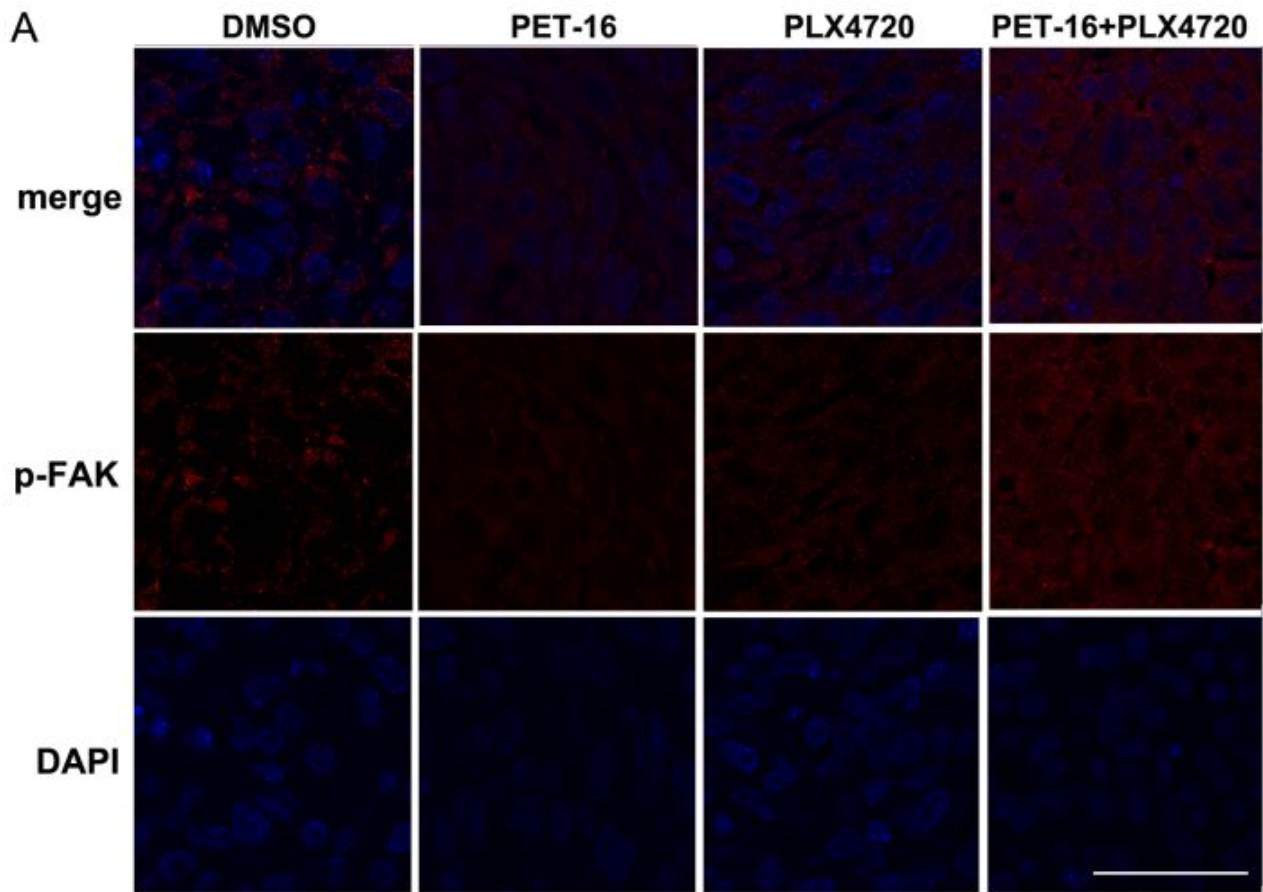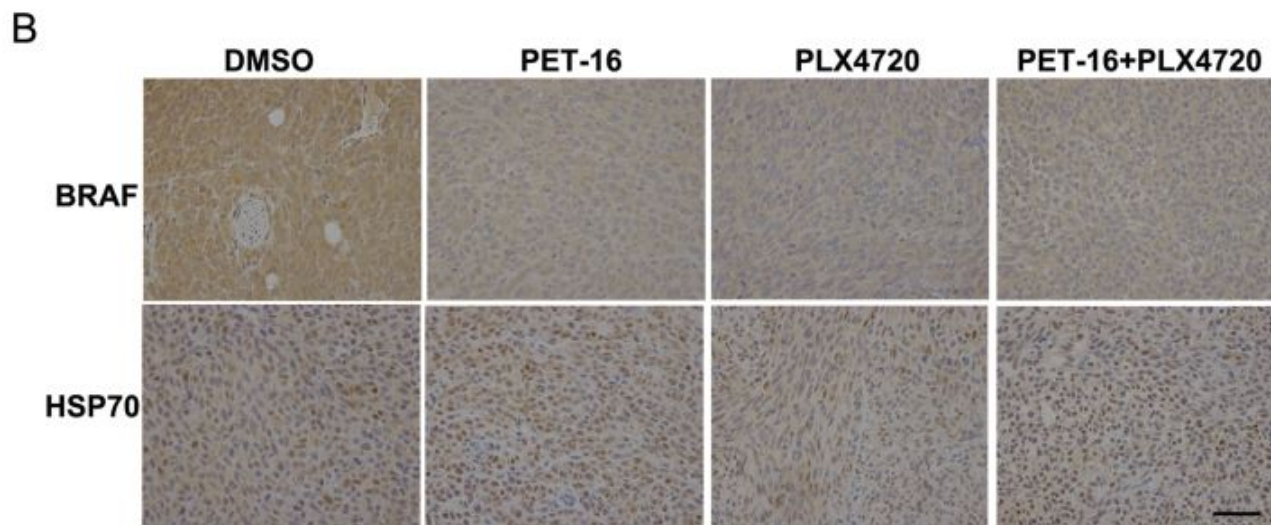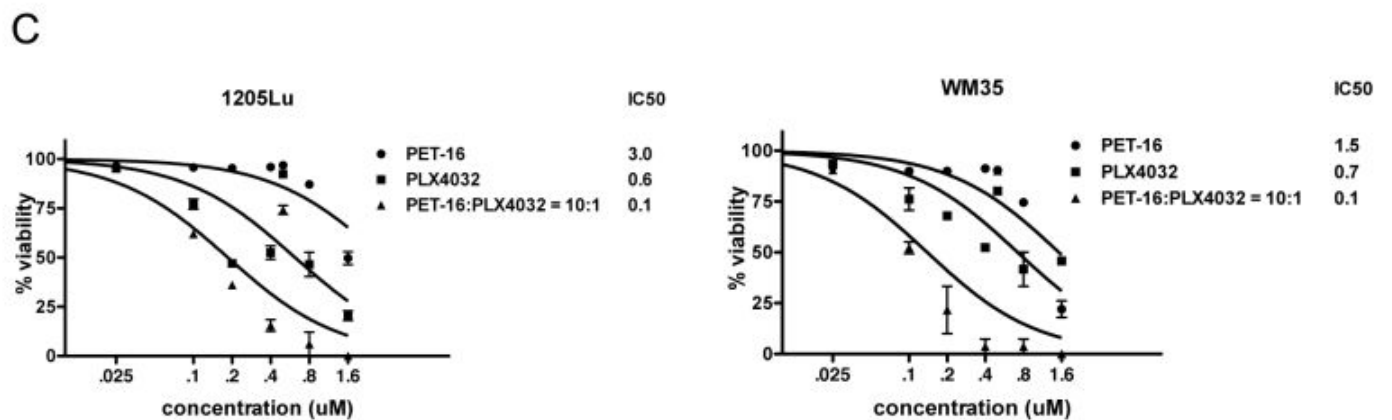

Supplement: NIHMS778369-supplement-7.pdf [file NIHMS778369-supplement-7.pdf]

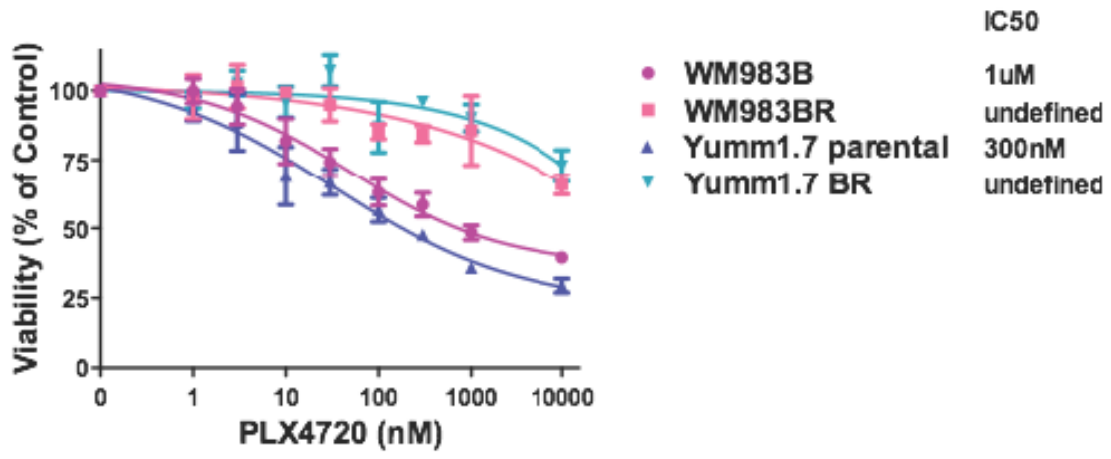

Supplement: NIHMS778369-supplement-8.pdf [file NIHMS778369-supplement-8.pdf]
